# Supplementary material for: Metabolic score for insulin resistance predicts major adverse cardiovascular event in premature coronary artery disease
Source: publisher site journal article supplement (doi:10.18632/aging.205710), 2024-04-01
Supplement: Supplementary file [file aging-v16i7-205710-supplementary-material-SD1.pdf]

SUPPLEMENTARY FIGURES

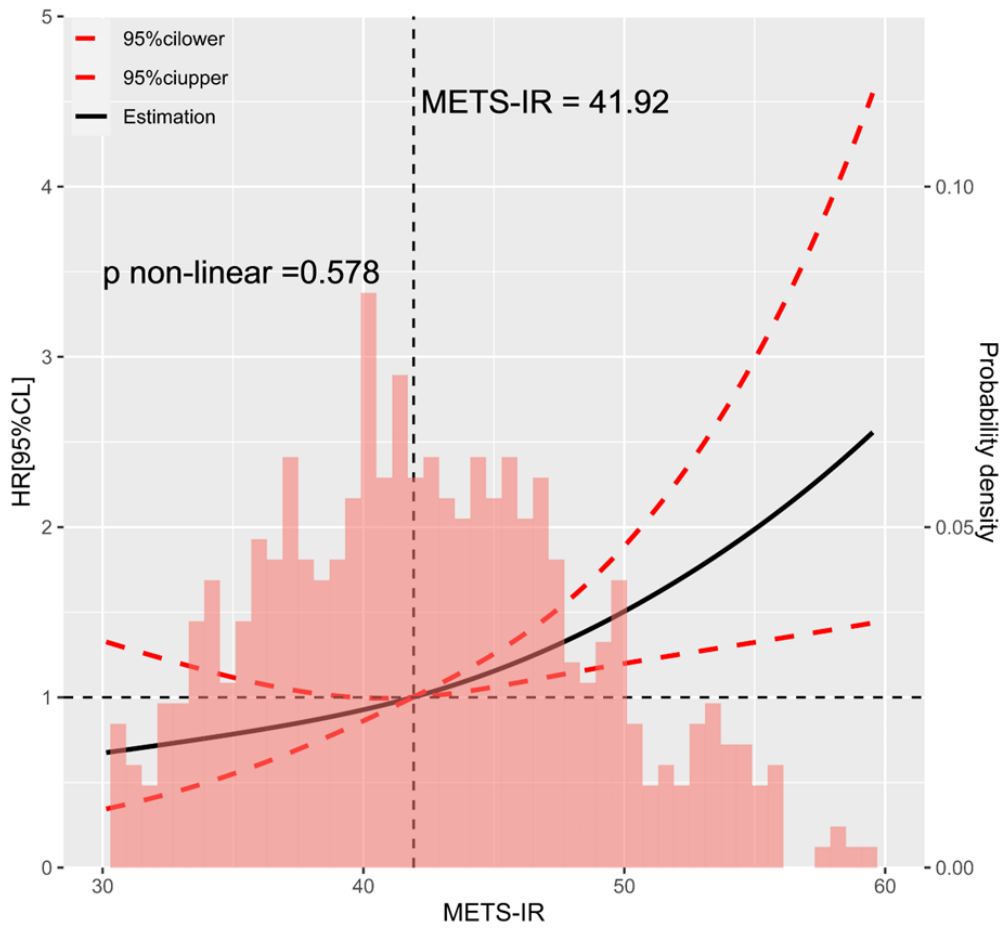

**Supplementary Figure 1. The association between METS-IR and MACE.** Adjusted for age, gender, LVEF, admission for MI, multivessel disease, GS, current smoking, FH-CAD, DM, hypertension, TC, LDL-C, eGFR, UA, antiplatelet drugs, statins, betablockers, ACEI/ARB, Oral hypoglycemic drugs, Insulin.

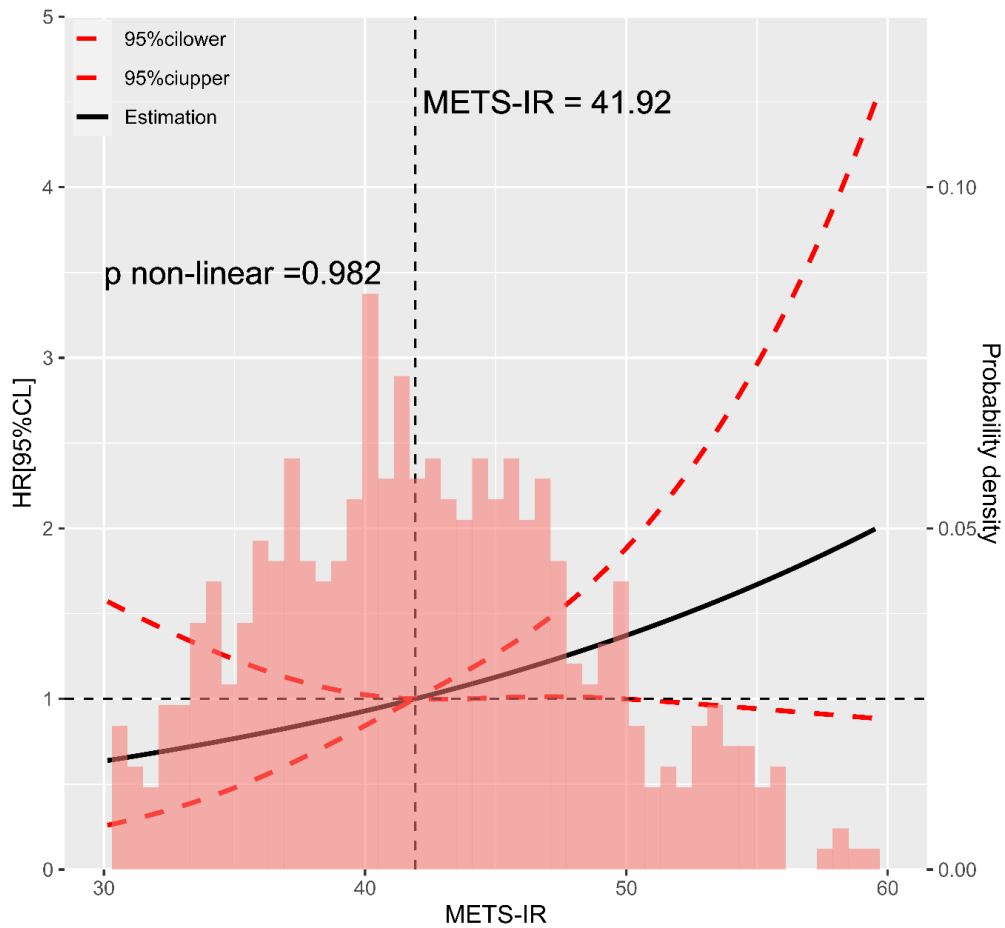

**Supplementary Figure 2. The association between METS-IR and repeat coronary artery revascularization.** Adjusted for age, gender, LVEF, admission for MI, multivessel disease, GS, current smoking, FH-CAD, DM, hypertension, TC, LDL-C, eGFR, UA, antiplatelet drugs, statins, betablockers, ACEI/ARB, Oral hypoglycemic drugs, Insulins.

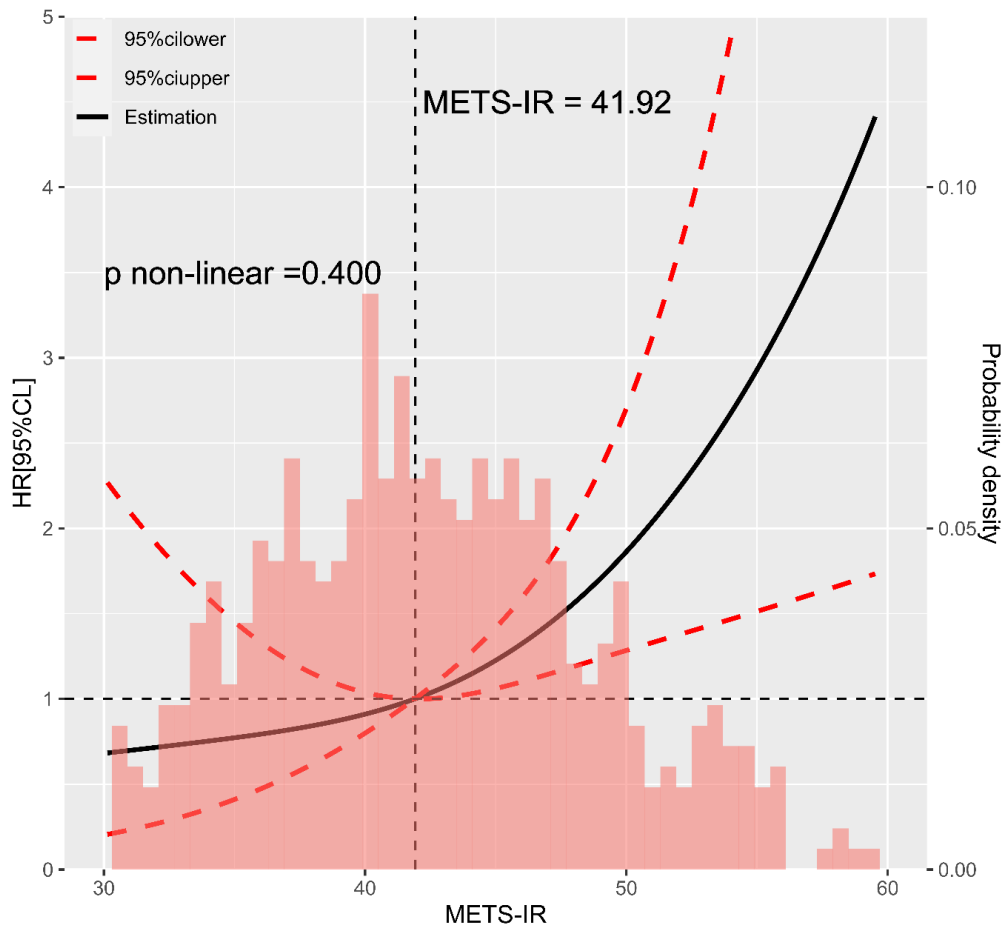

**Supplementary Figure 3. The association between METS-IR and non-fatal MI.** Adjusted for age, gender, LVEF, admission for MI, multivessel disease, GS, current smoking, FH-CAD, DM, hypertension, TC, LDL-C, eGFR, UA, antiplatelet drugs, statins, betablockers, ACEI/ARB, Oral hypoglycemic drugs, Insulins.
