# Supplementary material for: Metabolic score for insulin resistance predicts major adverse cardiovascular event in premature coronary artery disease
Source: publisher site journal article supplement (doi:10.18632/aging.205710), 2024-04-01
Supplement: Supplementary file [file aging-v16i7-205710-supplementary-material-SD2.pdf]

## SUPPLEMENTARY TABLES

**Supplementary Table 1. Baseline characteristics of the study and lost population.**

| Variables                           | Study                 | Lost                  | <i>p</i> -value |
|-------------------------------------|-----------------------|-----------------------|-----------------|
| <b>General conditions</b>           |                       |                       |                 |
| Age (years)                         | 44.43±6.33            | 44.62±6.56            | 0.406           |
| Male, n (%)                         | 352(60.5)             | 156 (58.6)            | 0.613           |
| BMI (kg/m <sup>2</sup> )            | 26.89±3.35            | 26.79±3.47            | 0.622           |
| LVEF (%)                            | 60.00(56.00-65.00)    | 60.00(57.00-65.00)    | 0.866           |
| Admission for MI, n (%)             | 161(27.7)             | 79(29.7)              | 0.541           |
| GS                                  | 36.75(21.00-61.00)    | 34.00(20.00-60.25)    | 0.692           |
| Multivessel disease, n (%)          | 261(44.8)             | 114(42.9)             | 0.589           |
| <b>Risk factors, n (%)</b>          |                       |                       |                 |
| Current Smoking                     | 172(29.6)             | 70(26.3)              | 0.333           |
| FH-CAD                              | 167(28.7)             | 73(27.4)              | 0.708           |
| DM                                  | 124(21.3)             | 58(21.8)              | 0.870           |
| Hypertension                        | 321(55.2)             | 146(54.9)             | 0.942           |
| <b>Laboratory test</b>              |                       |                       |                 |
| FPG (mg/dL)                         | 89.02(81.09-108.03)   | 89.11(81.43-111.90)   | 0.890           |
| TC (mg/dL)                          | 154.45(129.12-185.28) | 154.64(130.19-189.82) | 0.521           |
| TG (mg/dL)                          | 128.39(97.44-180.05)  | 126.62(97.40-175.18)  | 0.727           |
| LDL-C (mg/dL)                       | 95.10(74.13-118.40)   | 95.49(74.90-121.01)   | 0.673           |
| HDL-C (mg/dL)                       | 95.10(74.13-118.40)   | 40.98(35.57-48.71)    | 0.957           |
| eGFR (mL/min/1.73m <sup>2</sup> )   | 114.52(100.54-130.45) | 114.38(102.12-131.04) | 0.899           |
| UA (μmol/L)                         | 318.50(257.00-371.25) | 315.50(254.75-367.00) | 0.553           |
| <b>Discharge medications, n (%)</b> |                       |                       |                 |
| Antiplatelet drugs                  | 551(94.7)             | 251(94.4)             | 0.970           |
| Stains                              | 555(95.4)             | 252(94.7)             | 0.694           |
| Beta-blockers                       | 369(63.4)             | 165(62.0)             | 0.701           |
| ACEI/ARB                            | 265(45.5)             | 123(46.2)             | 0.848           |
| Oral hypoglycemic drugs             | 66(11.3)              | 33(12.4)              | 0.654           |
| Insulins                            | 25(4.3)               | 14(5.3)               | 0.533           |
| METS-IR                             | 42.33±7.25            | 42.08±7.31            | 0.998           |

Data were given as mean ± SD, median with interquartile range or n (%).

MACE, major adverse cardiovascular events; BMI, body mass index; LVEF, left ventricle ejection fraction; MI, myocardial infarction; GS, Gensini score; FH-CAD, family history of coronary artery disease; DM, diabetes mellitus; FPG, fasting plasma glucose; TC, total cholesterol; TG, triglyceride; LDL-C, low-density lipoprotein-cholesterol; HDL-C, high-density lipoprotein-cholesterol; eGFR, estimated glomerular filtration rate; UA, uric acid; ACEI, angiotensin-converting enzyme inhibitors; ARB, angiotensin receptor blockers; METS-IR, metabolic score for insulin resistance.

**Supplementary Table 2. Sensitivity analysis between METS-IR and endpoints.**

| METS-IR             | HR (95%CL)        |                                          |                    |
|---------------------|-------------------|------------------------------------------|--------------------|
|                     | MACE              | Repeat coronary artery revascularization | Non-fatal MI       |
| Per 1 Unit increase | 1.05(1.02-1.08) * | 1.04(1.00-1.08) *                        | 1.07(1.02-1.13) *  |
| Per 1 SD increase   | 1.40(1.14-1.72) * | 1.32(1.00-1.73) *                        | 1.68(1.19-2.38) *  |
| Tretille1           | Reference         | Reference                                | Reference          |
| Tretille2           | 1.74(1.00-3.01) * | 1.51(0.73-3.12)                          | 2.47(0.90-6.80)    |
| Tretille3           | 2.58(1.46-4.55) * | 2.39(1.15-4.97) *                        | 3.85(1.36-10.90) * |
| <i>p</i> for trend  | <b>0.001</b>      | <b>0.017</b>                             | <b>0.010</b>       |

Multivariable model adjusted for age, gender, LVEF, admission for MI, multivessel disease, GS, current smoking, FH-CAD, DM, hypertension, TC, LDL-C, eGFR, UA, antiplatelet drugs, statins, betablockers, ACEI/ARB, Oral hypoglycemic drugs, Insulins.

The sensitivity analysis excluded events occurring in first six months of follow-up.

MACE, major adverse cardiovascular events; METS-IR, metabolic score for insulin resistance; HR, hazard ratio; CI, confidence interval; SD, standard deviation; Non-fatal MI, non-fatal myocardial infraction.

*p*-values in bold are <0.05.

\* *p* <0.05.
